# Supplementary material
Source: Royal Society of Chemistry journal article supplement (doi:10.1039/d6ce00187d)
Supplement: d6ce00187d1.pdf [file d6ce00187d1.pdf]

## **Electronic Supplementary Information (ESI)**

### **Synthon-driven polymorphism in the favipiravir-theophylline cocrystal**

Prasitaditya Kuri<sup>a,b</sup> and Jagadeesh Babu Nanubolu<sup>\*ab</sup>

<sup>a</sup>Centre for X-ray Crystallography, Department of Analytical & Structural Chemistry, CSIR-Indian Institute of Chemical Technology (CSIR-IICT), Tarnaka, Uppal Road, Hyderabad-500007, Telangana, India.

<sup>b</sup>Academy of Scientific and Innovative Research (AcSIR), Ghaziabad, 201002, India

\*Corresponding Author

E-mail Ids: [jagadeesh81@gmail.com](mailto:jagadeesh81@gmail.com), [njbabu.iict@csir.res.in](mailto:njbabu.iict@csir.res.in)

| <b>S.No</b> | <b>Table/Fig No</b> | <b>Description</b>                                                                      | <b>Page No</b> |
|-------------|---------------------|-----------------------------------------------------------------------------------------|----------------|
| 1           | Table S1            | Summary of experiments performed for reproducing FAV-THP form II.                       | 2-4            |
| 2           | Figure S1           | DSC overlays of cooling and second heating cycle of varying compositions of FAV and THP | 5              |
| 3           | Figure S2           | Fingerprint plot analysis of favipiravir and theophylline                               | 6              |

**Table S1.** Summary of experiments performed for reproducing FAV-THP form II.

| Sl. No. | FAV-THP | Method                   | Solvent                               | Result           |
|---------|---------|--------------------------|---------------------------------------|------------------|
| 1.      | 1:1     | Solvent evaporation (SE) | Ethanol                               | Form I           |
| 2.      | 1:1     |                          | Methanol                              |                  |
| 3.      | 1:1     |                          | Isopropyl alcohol (IPA)               |                  |
| 4.      | 1:1     |                          | 1-Butanol                             |                  |
| 5.      | 1:1     |                          | N,N-dimethylacetamide (NNDMA)         |                  |
| 6.      | 1:1     |                          | 2-butanol                             |                  |
| 7.      | 1:1     |                          | Nitromethane                          |                  |
| 8.      | 1:1     |                          | Ethylacetoacetate                     | Phase separation |
| 9.      | 1:1     |                          | Isopropyl acetate                     | Form I           |
| 10.     | 1:1     |                          | Tetrahydrofuran (THF)                 | Phase separation |
| 11.     | 1:1     |                          | Butane-2-one                          | Form I           |
| 12.     | 1:1     |                          | Acetonitrile (ACN)                    |                  |
| 13.     | 1:1     |                          | 1,4-dioxane                           |                  |
| 14.     | 1:1     |                          | Dimethylsulfoxide (DMSO)              |                  |
| 15.     | 1:1     |                          | DCM, nitromethane                     |                  |
| 16.     | 1:1     |                          | Chloroform, THF                       |                  |
| 17.     | 1:1     |                          | IPA, 1-butanol                        |                  |
| 18.     | 1:1     |                          | Methanol, ethanol                     |                  |
| 19.     | 1:1     |                          | Acetone, THF                          |                  |
| 20.     | 1:1     |                          | Ethanol, ethylacetoacetate            |                  |
| 21.     | 1:1     |                          | Chloroform, nitromethane              |                  |
| 22.     | 1:1     |                          | 2-butanol, ethylacetate               |                  |
| 23.     | 1:1     |                          | Butane-2-ol, IPA                      |                  |
| 24.     | 1:1     |                          | Nitromethane, THF                     |                  |
| 25.     | 1:1     |                          | Acetic acid, nitromethane             |                  |
| 26.     | 1:1     |                          | Methanol, IPA                         |                  |
| 27.     | 1:1     |                          | Acetic acid, IPA                      |                  |
| 28.     | 1:1     |                          | Acetone, ethanol                      |                  |
| 29.     | 1:1     |                          | Chloroform, acetic acid               |                  |
| 30.     | 1:1     |                          | THF, butane-2-one                     |                  |
| 31.     | 1:1     |                          | Acetic acid, methanol, ethanol        |                  |
| 32.     | 1:1     |                          | Methanol, NNDMA, nitromethane         |                  |
| 33.     | 1:1     |                          | Dimethylformamide (DMF), IPA, ethanol |                  |
| 34.     | 1:1     |                          | 1,4-dioxane, 1-propanol, ethanol      |                  |

|     |     |                              |                                          |                  |
|-----|-----|------------------------------|------------------------------------------|------------------|
| 35. | 1:1 |                              | Isopropylacetate, ethylacetate, methanol |                  |
| 36. | 1:1 |                              | ACN, methanol, IPA                       |                  |
| 37. | 1:1 |                              | DMSO, methanol, 1-propanol               |                  |
| 38. | 1:1 |                              | Methanol, ACN, ethanol                   |                  |
| 39. | 1:1 |                              | Nitromethane, methanol, 1-propanol       |                  |
| 40. | 1:1 |                              | Chloroform, DMF, DMSO                    |                  |
| 41. | 1:1 |                              | Methanol, DMSO, DMF                      |                  |
| 42. | 1:1 |                              | Chloroform, methanol, nitromethane       |                  |
| 43. | 1:1 |                              | DMSO, ethanol, methanol                  |                  |
| 44. | 1:1 |                              | Chloroform, DMF, ethanol                 |                  |
| 45. | 1:1 |                              | Methanol, ACN, 1-propanol                |                  |
| 46. | 1:2 |                              | 2-butanol                                |                  |
| 47. | 1:2 |                              | Methanol/2-butanol                       |                  |
| 48. | 1:2 |                              | 2-butanol                                |                  |
| 49. | 1:2 |                              | Ethanol                                  |                  |
| 50. | 2:1 |                              | IPA                                      |                  |
| 51. | 1:2 |                              | Ethanol/IPA                              |                  |
| 52. | 1:3 |                              | Methanol                                 |                  |
| 53. | 3:1 |                              | Methanol                                 |                  |
| 54. | 4:1 |                              | IPA/methanol                             | Form I           |
| 55. | 1:4 |                              | IPA/ methanol                            |                  |
| 56. | 1:1 |                              | Methanol, SPAN-20 (5%)                   |                  |
| 57. | 1:1 |                              | Methanol, hydroxypropyl cellulose (5%)   |                  |
| 58. | 1:1 |                              | Methanol, TWEEN-80 (5%)                  |                  |
| 59. | 1:1 |                              | Ethanol, lactose monohydrate (2%)        |                  |
| 60. | 1:1 |                              | Methanol/ ethanol (1:1), SPAN-80 (10%)   |                  |
| 61. | 1:1 | Anti-solvent crystallization | IPA, hexane                              | Physical mixture |
| 62. | 1:1 |                              | Methanol, heptanes                       | Form I           |
| 63. | 1:1 | Vapor diffusion              | Acetone, hexane                          | Physical mixture |
| 64. | 1:1 |                              | ACN, hexane                              | Form I           |
| 65. | 1:1 |                              | ACN, heptane                             |                  |
| 66. | 1:1 |                              | Methanol, hexane                         |                  |
| 67. | 1:1 |                              | Methanol, heptane                        |                  |
| 68. | 1:1 |                              | IPA, hexane                              |                  |
| 69. | 1:1 |                              | Methanol, hexane                         |                  |
| 70. | 1:1 |                              | Acetone, hexane                          |                  |
| 71. | 1:1 |                              | Methanol, THF                            |                  |

|      |     |                                                     |                |                           |
|------|-----|-----------------------------------------------------|----------------|---------------------------|
| 72.  | 1:1 |                                                     |                | Ethanol, DCM              |
| 73.  | 1:1 |                                                     |                | Ethanol, THF              |
| 74.  | 1:1 |                                                     |                | Acetic acid, hexane       |
| 75.  | 1:1 |                                                     |                | NNDMA, heptane            |
| 76.  | 1:1 |                                                     |                | 1-butanol, hexane         |
| 77.  | 1:1 |                                                     |                | Nitromethane, cyclohexane |
| 78.  | 1:1 |                                                     |                | 1-butanol, heptane        |
| 79.  | 1:1 |                                                     |                | NNDMA, benzene            |
| 80.  | 1:1 | Rotary evaporation                                  | 60 °C, 70rpm   | 1-butanol                 |
| 81.  | 1:1 |                                                     | 55 °C, 70 rpm  | DCM, methanol             |
| 82.  | 1:1 |                                                     | 60 °C, 70rpm   | IPA                       |
| 83.  | 1:1 |                                                     | 60 °C, 70rpm   | methanol                  |
| 84.  | 1:1 |                                                     | 60 °C, 70rpm   | ethanol                   |
| 85.  | 1:1 |                                                     | 60 °C, 70rpm   | Ethanol, 1-propanol       |
| 86.  | 1:1 |                                                     | 60 °C, 70rpm   | IPA-methanol              |
| 87.  | 1:1 |                                                     | 50 °C, 50 rpm  | 1-propanol, ethanol       |
| 88.  | 1:1 |                                                     | 50 °C, 80 rpm  | 1-propanol, ethanol       |
| 89.  | 1:1 |                                                     | 50 °C, 100 rpm | 1-propanol, ethanol       |
| 90.  | 1:1 |                                                     | 50 °C, 150 rpm | 1-propanol, ethanol       |
| 91.  | 1:1 | Reflux, 100 °C, 2 hours                             |                | ethanol                   |
| 92.  | 1:1 | Cooling crystallization                             |                | Ethylacetoacetatae        |
| 93.  | 1:1 |                                                     |                | Acetone                   |
| 94.  | 1:1 |                                                     |                | IPA                       |
| 95.  | 1:1 | Rapid solvent evaporation under vacuum (speed vac.) | 60 °C          | IPA                       |
| 96.  | 1:1 |                                                     |                | Ethanol                   |
| 97.  | 1:1 |                                                     |                | ACN                       |
| 98.  | 1:1 |                                                     |                | Methanol                  |
| 99.  | 1:1 |                                                     |                | Ethanol, methanol         |
| 100. | 1:1 |                                                     |                | Methanol, ACN             |
| 101. | 1:1 |                                                     |                | IPA, ethanol              |
| 102. | 1:1 |                                                     |                | IPA, methanol             |

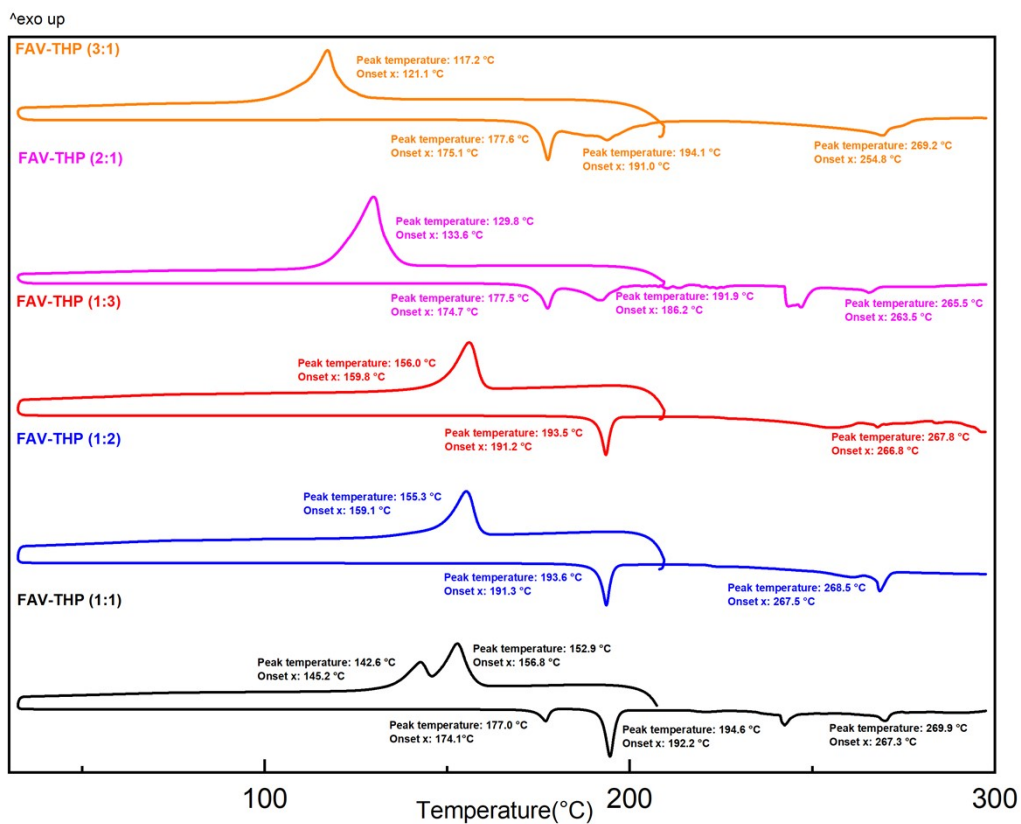

**Figure S1.** DSC overlays of cooling and second heating cycle of varying compositions of FAV and THP.

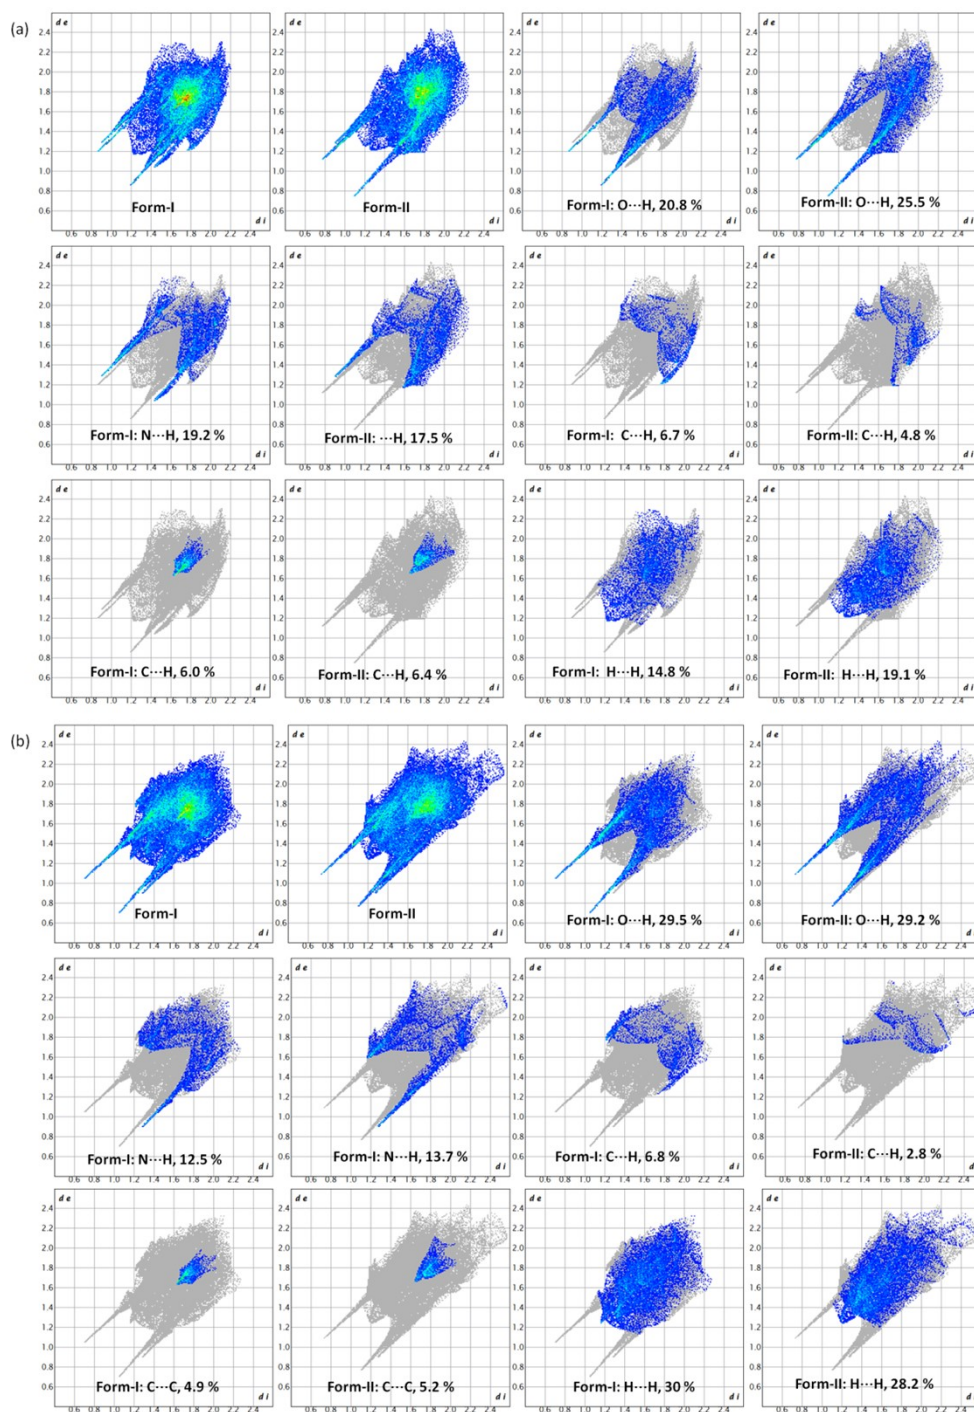

**Figure S2.** Fingerprint plot analysis of (a) favipiravir, (b) theophylline in FAV-THP cocrystal forms I and II. The fingerprint plot quantifies the percentage of O...H, N...H, C...H, C...C and H...H contacts.
